# Supplementary material for: Ccdc94 Protects Cells from Ionizing Radiation by Inhibiting the Expression of p53
Source: PubMed Central journal article supplement (PMC3431329; doi:10.1371/journal.pgen.1002922), 2012-08-30
Supplement: pgen.1002922.s009.pdf [file pgen.1002922.s009.pdf]

## Supplemental Experimental Procedures:

### (A) mRNA expression constructs: Primers used for sub-cloning into pCS2+

|                       |                                          |
|-----------------------|------------------------------------------|
| zcdc94-EcoRI-fwd:     | CATGGAATTCATGTCGGAAAGAAAAGTTTTAAAT       |
| zcdc94-XhoI-rev:      | CATGCTCGAGCTAGTCTGAGCTGCTGTCG            |
| hCCDC94-EcoRI-fwd:    | CATGGAATTCATGTCGGAGCGAAAAGTATTAA         |
| hCCDC94-XhoI-rev:     | CATGCTCGAGTCAGTTGCTGCCGTTGCTG            |
| zbcl-2-EcoRI-fwd:     | CATGGAATTCATGGCTAACGAAATTAGCTATG         |
| zbcl-2-XhoI-rev:      | CATGCTCGAGTCACTTCTGAGCAAAAAGGC           |
| zbclxL-EcoRI-fwd:     | CATGGAATTCATGTCTTACTATAACCGAGAAC         |
| zbclxL-XhoI-rev:      | CATGCTCGAGTCACAGGCGTTTCTGTGC             |
| egfp-ClaI-fwd:        | CATGATCGATATGGTGAGCAAGGGCGAG             |
| egfp-EcoRI-rev:       | CATGGAATTCGACTTGTACAGCTCGTCCATG          |
| zplrg1-R1-For         | CATGGAATTCATGACCGAGGACGTGCAG             |
| zplrg1-Xho-Rev        | CATGCTCGAGCTAAAATCGCTTTCTTTTCAGAATC      |
| zplrg1-mut-For4rescue | CATGGGATCCATGACAGAAGATGTCCAAAACATTCAGTCC |

### (B) Morpholinos:

|                                             |                                                     |
|---------------------------------------------|-----------------------------------------------------|
| translation-blocking " <i>ccdc94 atg</i> ": | AACTTTTCTTTCCGACATGGTTCTC                           |
| splice-blocking <i>prp19</i> e3i3:          | AGTCAGGTTAAAGGACTCACCCACT                           |
| translation-blocking <i>plrg1</i> :         | AGTGCTTCTGCACGTCCTCGGTCAT (Kleinriders et al, 2009) |
| control morpholino:                         | ATTTGTCCCATCATTCAACGTGTTG                           |

### (C) Validation of *prp19* morpholino specificity: Primers used to amplify *prp19* cDNA

|                              |                      |
|------------------------------|----------------------|
| <i>prp19</i> exon1for (F1)   | ATAGCGGAGAATGGAGCTGA |
| <i>prp19</i> intron2rev (R2) | CCCCATGATCAGACTGTTT  |

### (D) Whole-mount in situ hybridization: Primers used for sub-cloning into pGEM-T-Easy vector

|              |                                 |
|--------------|---------------------------------|
| zp53-R1-For  | CATGGAATTCATGGCGCAAAACGACAGCC   |
| zp53-Xho-Rev | CATGCTCGAGATCAGAGTCGCTTCTTCCTTC |

### (E) qPCR primers and probes (Roche Universal Probe Library)

|               |                        |
|---------------|------------------------|
| z28S probe:   | Universal Probe #103   |
| z28S-for:     | AAACCAACCCGGAGAAGC     |
| z28S-rev:     | CGCGAGATTTACACCCTCTCT  |
| zapaf1 probe: | Universal Probe #123   |
| zapaf1L2      | CCTGCGCTTCCTAATGCT     |
| zapaf1R2      | CTGCATTGGATATCAAAGACCT |
| zcasp7 probe: | Universal Probe #117   |
| zcasp7L1      | AAGGAGACGTGTGCAAGAGC   |

|                                |                          |
|--------------------------------|--------------------------|
| zcasp7R1                       | GACAGGCCTGGATGAAAAAG     |
| zgapdh probe:                  | Universal Probe #147     |
| zgapdh-for:                    | CAGGCATAATGGTTAAAGTTGGTA |
| zgapdh-rev:                    | CATGTAATCAAGGTCAATGAATGG |
| zp53 pre-mRNA (intron9) probe: | Universal Probe #10      |
| zp53-intron9-for:              | GCACAATACACCAGTGGTAAGG   |
| zp53-intron9-rev:              | GCAAAAACAATCAGATGCACTT   |
| zp53 mRNA (prom1) probe:       | Universal Probe #7       |
| zp53prom1F:                    | GAGGTCGGCAAATCAATTC      |
| zp53prom1R:                    | CACCTGGGGGCTGAATAAT      |
| zp73 probe:                    | Universal Probe #83      |
| zp73L1                         | CTTTCCAGCAGTCCAGCAC      |
| zp73R1                         | TTCTTGAGCAATGGAGAGTACG   |
| zplrg1 probe:                  | Universal Probe #121     |
| zplrg1F                        | AAACCTATAGCGCAGGACGA     |
| zplrg1R                        | GTATTCGGCCCGCATCTT       |
| zpuma probe:                   | Universal Probe #18      |
| zpuma-for:                     | GCCTTCAGCTTGGACAGC       |
| zpuma-rev:                     | GGACACTTCCTGTTCTGTTCT    |
